# Supplementary material for: Long-lived nuclear spin states in monodeuterated methyl groups
Source: Royal Society of Chemistry journal article supplement (doi:10.1039/c6cp03619h), 2016-01-01
Supplement: c6cp03619h1.pdf [file c6cp03619h1.pdf]

## Supplementary Information

---

### Long-Lived Nuclear Spin States in Monodeuterated Methyl Groups

---

Stuart J. Elliott<sup>a</sup>, Lynda J. Brown<sup>a</sup>, Jean-Nicolas Dumez<sup>b</sup> and Malcolm H. Levitt<sup>a</sup>

<sup>a</sup>*School of Chemistry, University of Southampton, Southampton, SO17 1BJ, United Kingdom*

<sup>b</sup>*Institut de Chimie des Substances Naturelles, CNRS UPR2301, Univ. Paris Sud, Université Paris-Saclay, 91190, Gif-sur-Yvette, France*

## Contents

|          |                                                                   |           |
|----------|-------------------------------------------------------------------|-----------|
| <b>1</b> | <b>Synthesis</b>                                                  | <b>3</b>  |
| 1.1      | 2-Methyl-1-(methyl-d)piperidine . . . . .                         | 3         |
| 1.2      | 1-(methyl-d)-2-(methyl-d <sub>3</sub> )piperidine . . . . .       | 4         |
| <b>2</b> | <b>NMR spectra</b>                                                | <b>6</b>  |
| 2.1      | Sample preparation . . . . .                                      | 6         |
| 2.2      | <sup>1</sup> H spectrum . . . . .                                 | 6         |
| 2.3      | <sup>13</sup> C spectrum with <sup>1</sup> H decoupling . . . . . | 7         |
| 2.4      | <sup>2</sup> H spectrum . . . . .                                 | 8         |
| <b>3</b> | <b>NMR relaxation measurements</b>                                | <b>9</b>  |
| 3.1      | Experimental . . . . .                                            | 9         |
| 3.2      | Pulse sequences . . . . .                                         | 9         |
| 3.3      | Relaxation times . . . . .                                        | 11        |
| 3.3.1    | Singlet and longitudinal relaxation . . . . .                     | 11        |
| 3.3.2    | <sup>13</sup> C relaxation . . . . .                              | 13        |
| 3.3.3    | <sup>2</sup> H relaxation . . . . .                               | 13        |
| <b>4</b> | <b>Relaxation Theory</b>                                          | <b>14</b> |
| <b>5</b> | <b>References</b>                                                 | <b>16</b> |

## 1. Synthesis

### 1.1 2-Methyl-1-(methyl-d)piperidine

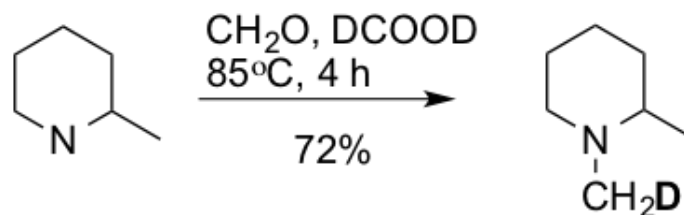

Figure S1: Synthetic route to 2-Methyl-1-(methyl-d)piperidine.

To 2-methylpiperidine (844 mg, 1 mL, 8.51 mmol) was added formaldehyde (37 wt.% in H<sub>2</sub>O, 767 mg, 2.07 mL, 25.53 mmol, 3 equiv.) followed by careful addition of formic acid-d<sub>2</sub> (95% in D<sub>2</sub>O, 1.72 g, 1.41 mL, 34.04 mmol, 4 equiv.), and the reaction heated at 85°C (using a water bath) for 3 h. The reaction was cooled to room temperature, water (2 mL) added and the acidic aqueous reaction was extracted with pet. ether. The aqueous layer was basified to pH 12 using 6 M NaOH and extracted with Et<sub>2</sub>O (x5). The combined Et<sub>2</sub>O extractions were dried (MgSO<sub>4</sub>) and concentrated on a rotary evaporator with no vacuum (bath temp = 40°C) to give a pale yellow oil. Purification by Kugelrohr distillation (oven temperature 150°C - 160°C) to give the title compound as a clear oil (696 mg, 6.09 mmol, 72%).

## 1.2 1-(methyl-d)-2-(methyl-d<sub>3</sub>)piperidine

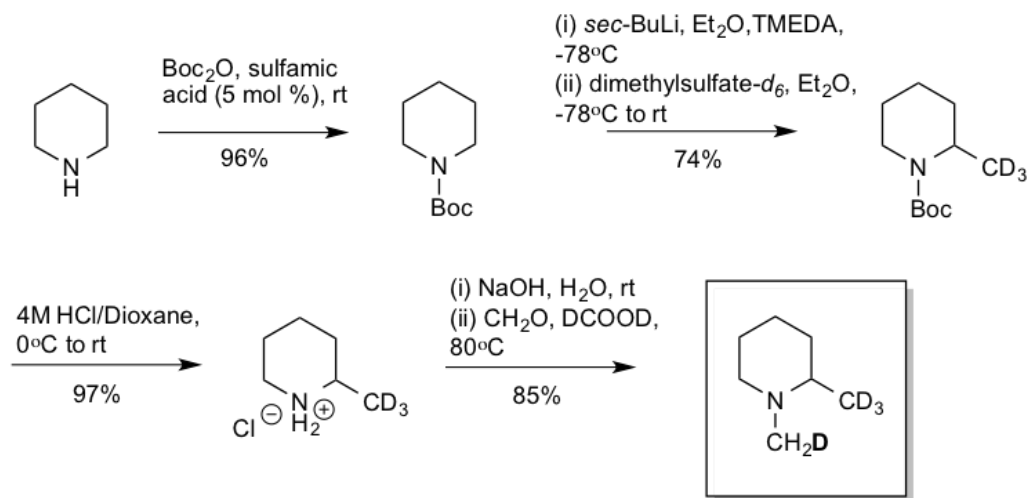

Figure S2: Synthetic route to 1-(methyl-d)-2-(methyl-d<sub>3</sub>)piperidine.

tert-Butyl piperidine-1-carboxylate:

Boc anhydride (6.78 g, 31.0 mmol) and sulfamic acid (150 mg, 1.5 mmol, 5 mol%) were mixed together neat and warmed to 28°C - 30°C to melt the (Boc)<sub>2</sub>O. Piperidine (3.2 mL, 2.77 g, 32.0 mmol) was added and the resulting mixture was stirred at room temperature for 15 minutes. The reaction was diluted with Et<sub>2</sub>O, washed with H<sub>2</sub>O (x 2) and brine (x 2) and dried (MgSO<sub>4</sub>). Removal of the solvents in vacuo (no heat) gave the title product as a pale yellow oil (5.51 g, 29.8 mmol, 96%).

tert-Butyl 2-(methyl-d<sub>3</sub>)piperidine-1-carboxylate:

A solution of tert-butyl piperidine-1-carboxylate (2.5 g, 13.51 mmol) in Et<sub>2</sub>O (30 mL) was cooled to -78°C and treated with TMEDA (2.63 mL, 17.56 mmol) dropwise over 10 minutes. sec-BuLi (1.4 M in cyclohexane, 12.5 mL, 17.56 mmol) was added dropwise over 20 minutes. The pale yellow mixture was stirred for 5 h at -78°C. and then treated with a solution of dimethyl sulfate-d<sub>6</sub> (3.20 g, 24.32 mmol) in Et<sub>2</sub>O (12 mL). The mixture was warmed to room temperature and stirred for 12 h. The reaction was concentrated in vacuo to give a crude colorless oil which was purified by column chromatography on silica gel eluting with 2% - 5% Et<sub>2</sub>O: pet. ether. This afforded the title product as a clear oil (2.03 g, 10.0 mmol, 74%).

2-(methyl-d<sub>3</sub>)piperidin-1-ium chloride:

To tert-butyl 2-(methyl-d<sub>3</sub>)piperidine-1-carboxylate (1.0 g, 5.0 mmol) at 0°C was added 4M HCl in dioxane (4mL, 16 mmol) and the reaction stirred at room temperature for 30 minutes. Et<sub>2</sub>O (20 mL) was added producing a white solid. The reaction was concentrated in vacuo and Et<sub>2</sub>O (20 mL) added, the resultant white solid was filtered and washed with Et<sub>2</sub>O (2 x 10 mL) and dried in vacuo to give the desired white salt (0.67 g, 4.84 mmol, 97%) which was used directly in the next reaction.

1-(methyl-d)-2-(methyl-d<sub>3</sub>)piperidine:

2-(methyl-d<sub>3</sub>)piperidin-1-ium chloride (0.63 g, 4.55 mmol) was dissolved in a solution of sodium hydroxide (182 mg, 4.55 mmol) in H<sub>2</sub>O (2 mL) and stirred for 10 minutes at room temperature. To this mixture was added formaldehyde (37 wt.% in H<sub>2</sub>O, 410 mg, 1.10 mL, 13.65 mmol, 3 equiv.) resulting in a cloudy white solution. Formic acid-d<sub>2</sub> (95% in D<sub>2</sub>O, 0.86 mL, 22.75 mmol, 5 equiv.) was carefully added and the reaction heated at 85°C

(using a water bath) for 4 h. The reaction was cooled to room temperature, water (2 mL) added and the acidic aqueous reaction was extracted with pet. ether. The aqueous layer was basified to pH 12 using 6 M NaOH and extracted with Et<sub>2</sub>O (x5). The combined Et<sub>2</sub>O extractions were dried (MgSO<sub>4</sub>) and concentrated on a rotary evaporator with no vacuum (bath temp = 40°C) to give the title compound as a clear oil (455 mg, 3.89 mmol, 85%).

## 2. NMR spectra

### 2.1 Sample preparation

Solutions were prepared in Wilmad low pressure/vacuum NMR tubes with a 5 mm OD. 6.2  $\mu\text{L}$  of (N-CH<sub>2</sub>D)-2-methylpiperidine was dissolved in 0.5 mL of choice solvent at a concentration of 0.1 M. Samples were subjected to thorough degassing using 6 standard freeze-pump-thaw cycles to remove the majority of dissolved molecular oxygen.

### 2.2 <sup>1</sup>H spectrum

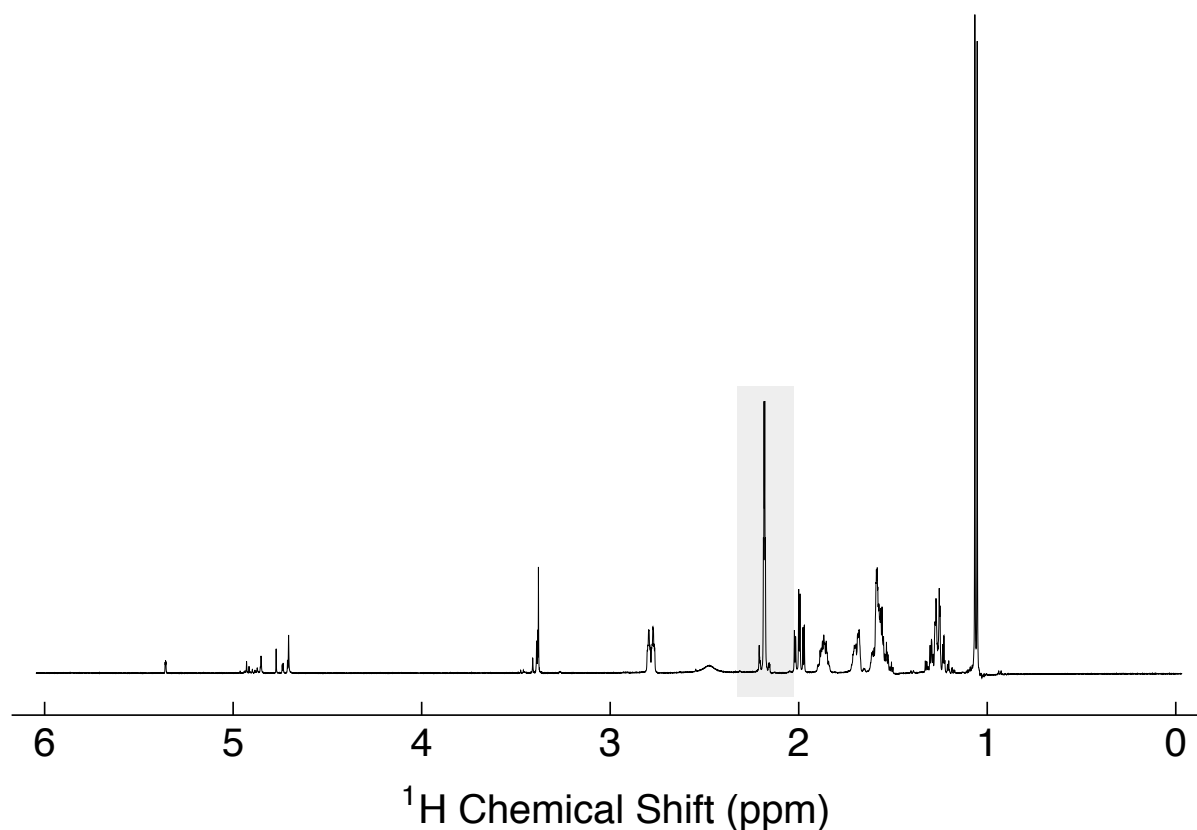

Figure S3: Experimental <sup>1</sup>H spectrum of (N-CH<sub>2</sub>D)-2-methylpiperidine in CD<sub>2</sub>Cl<sub>2</sub> solution acquired at 11.7 T (500 MHz) with a single transient. The grey region shows the CH<sub>2</sub>D resonances.

<sup>1</sup>H NMR (500 MHz, CD<sub>2</sub>Cl<sub>2</sub>):  $\delta$  = 2.80 - 2.76 (m, 1H, NCH<sub>2</sub>), 2.18 (d, 2H, J<sub>H,D</sub> = 0.98 Hz, CH<sub>2</sub>D), 2.01 - 1.95 (m, 1H, NCH<sub>2</sub>), 1.88 - 1.80 (m, 1H, NCHCH<sub>3</sub>), 1.70 - 1.48 (m, 4H, CH<sub>2</sub>), 1.29 - 1.16 (m, 2H, CH<sub>2</sub>), 1.04 (d, J<sub>H,H</sub> = 6.1 Hz, 3H).

Experimental <sup>1</sup>H spectrum of (N-CH<sub>2</sub>D)-2-methylpiperidine in CD<sub>2</sub>Cl<sub>2</sub> solution acquired at 11.7 T (500 MHz) with a single transient. The CH<sub>2</sub>D peak is at 2.18 ppm, highlighted by the shaded area. All peaks were referenced with respect to the CD<sub>2</sub>Cl<sub>2</sub> solvent resonance = 5.32 ppm. Traces of ether are observed beyond 3 ppm.

### 2.3 $^{13}\text{C}$ spectrum with $^1\text{H}$ decoupling

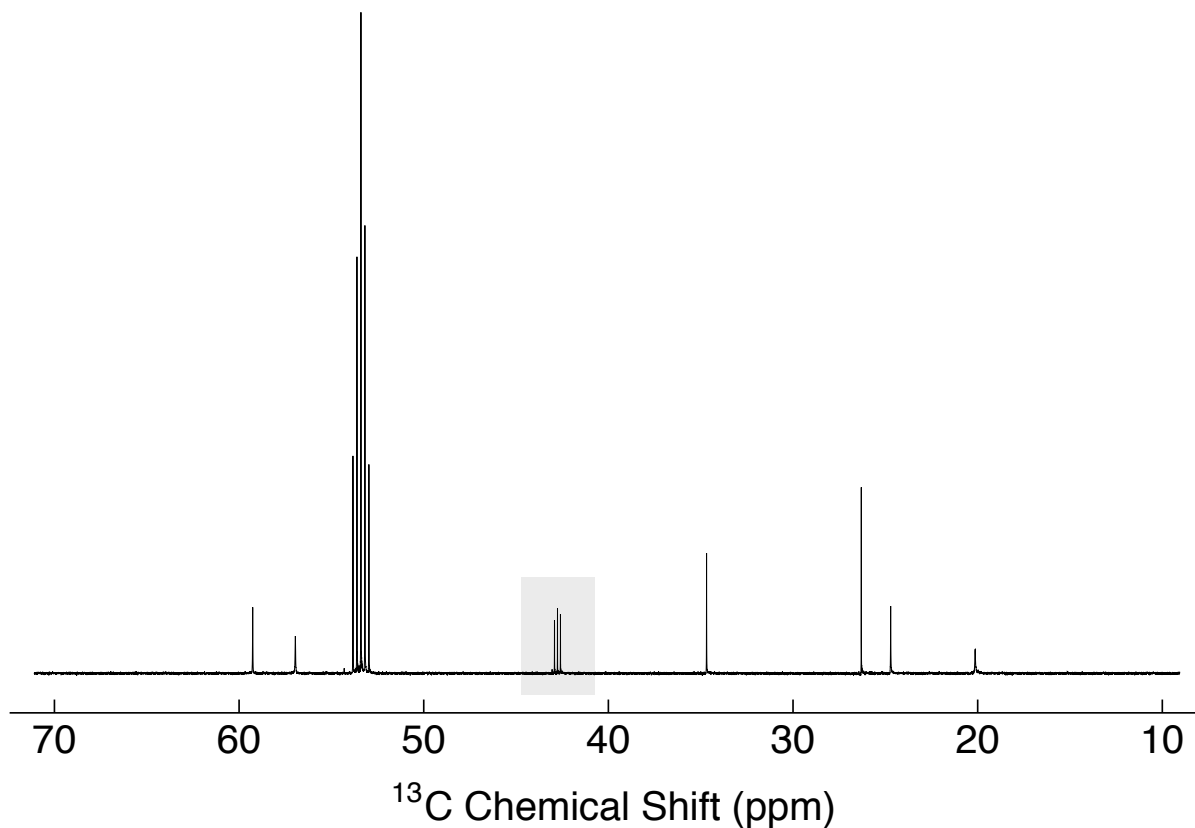

Figure S4: Experimental  $^{13}\text{C}$  spectrum with 0.5 kHz  $^1\text{H}$  decoupling of (N-CH<sub>2</sub>D)-2-methylpiperidine in CD<sub>2</sub>Cl<sub>2</sub> solution acquired at 11.7 T (500 MHz) with 1024 transients. The grey region shows the CH<sub>2</sub>D resonance.

$^{13}\text{C}\{\text{H}\}$  NMR (125 MHz, CD<sub>2</sub>Cl<sub>2</sub>):  $\delta$  = 59.27 (CH), 56.98 (NCH<sub>2</sub>), 42.92 (t,  $J_{D,C}$  = 20.54 Hz, CH<sub>2</sub>D), 34.57 (CH<sub>2</sub>), 26.14 (CH<sub>2</sub>), 24.51 (CH<sub>2</sub>), 20.23 (CH<sub>3</sub>).

Experimental  $^{13}\text{C}$  spectrum with 0.5 kHz  $^1\text{H}$  decoupling of (N-CH<sub>2</sub>D)-2-methylpiperidine in CD<sub>2</sub>Cl<sub>2</sub> solution acquired at 11.7 T (500 MHz) with 1024 transients. The CH<sub>2</sub>D peak is at 42.92 ppm, highlighted by the shaded area. The  $J_{D,C}$ -coupling is 20.54 Hz. All peaks were referenced with respect to the CD<sub>2</sub>Cl<sub>2</sub> solvent resonance = 54.00 ppm.

## 2.4 $^2\text{H}$ spectrum

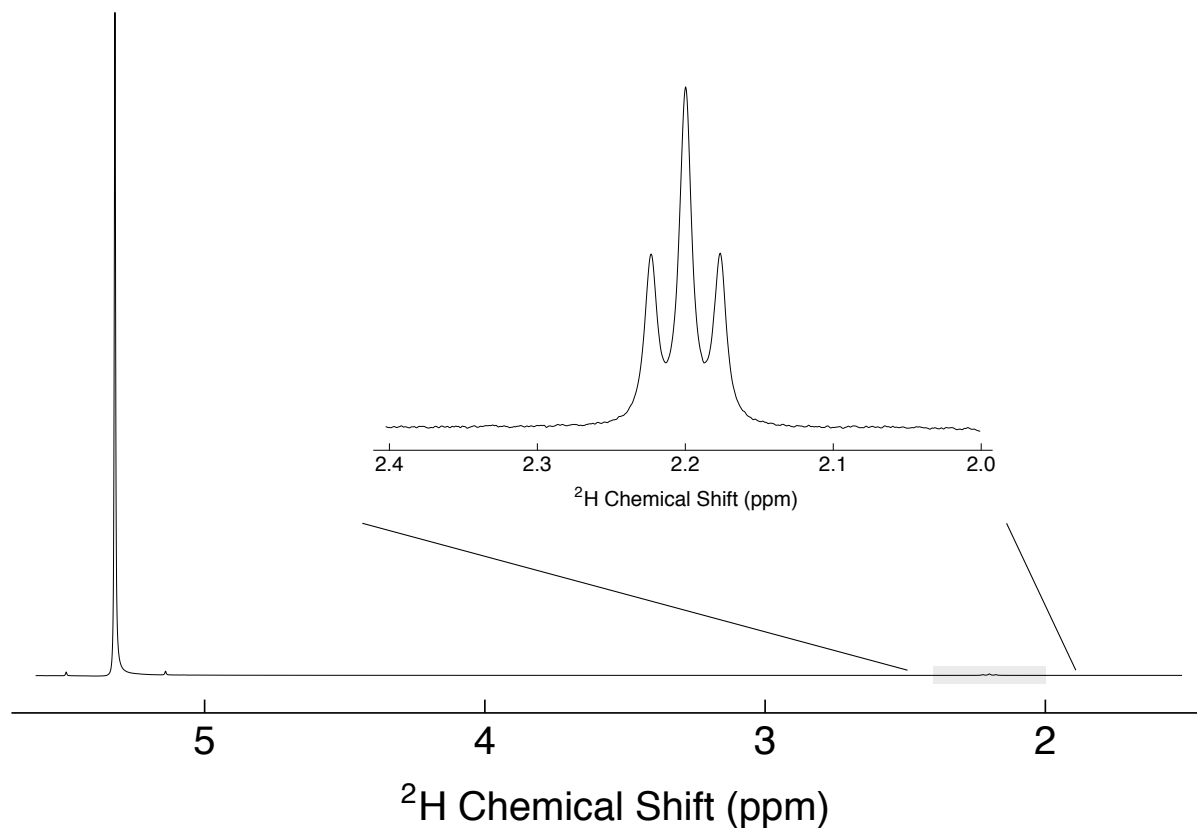

Figure S5: Experimental  $^2\text{H}$  spectrum of (N- $\text{CH}_2\text{D}$ )-2-methylpiperidine in  $\text{CD}_2\text{Cl}_2$  solution acquired at 11.7 T (500 MHz) with a 64 transients.

$^2\text{H}$  NMR (76.8 MHz,  $\text{CD}_2\text{Cl}_2$ ):  $\delta = 2.20$  (t,  $J_{\text{H,D}} = 1.8$  Hz,  $\text{CH}_2\text{D}$ ).

Experimental  $^2\text{H}$  spectrum of (N- $\text{CH}_2\text{D}$ )-2-methylpiperidine in  $\text{CD}_2\text{Cl}_2$  solution acquired at 11.7 T (500 MHz) with a 64 transients. The  $\text{CH}_2\text{D}$  peak is at 2.20 ppm, highlighted by the shaded area and shown in the inset. The  $J_{\text{H,D}}$ -coupling is 1.8 Hz. The  $\text{CH}_2\text{D}$  peak was referenced with respect to the  $\text{CD}_2\text{Cl}_2$  solvent resonance = 5.32 ppm.



### 3. NMR relaxation measurements

#### 3.1 Experimental

Experiments were performed on a Bruker Avance III 500 MHz spectrometer with a TBO probe running *TopSpin 3.2* software. Samples were left to thermally equilibrate for 30 minutes before additional shimming at every temperature increment. Constant air flow across the sample space ensured a fixed sample temperature throughout each relaxation measurement. Spinning at 20 Hz minimised the effects of temperature gradients and convection at increased temperatures.

#### 3.2 Pulse sequences

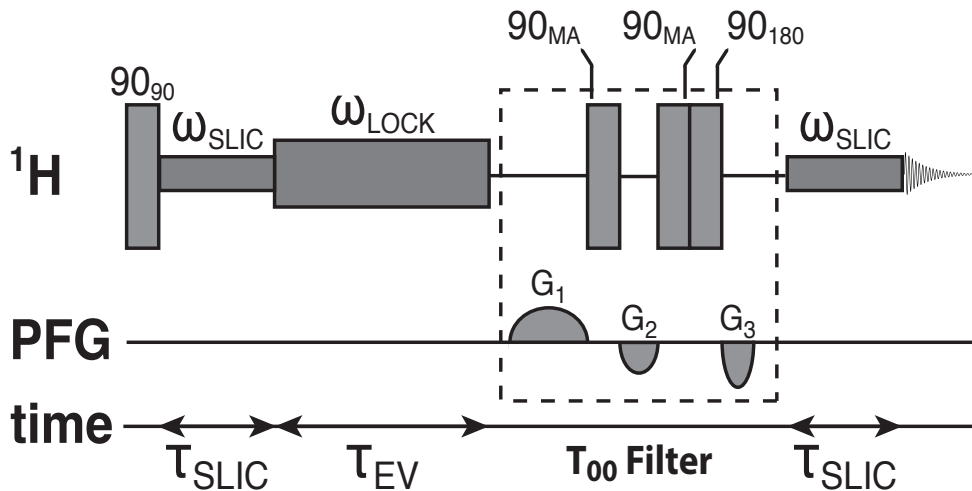

Figure S6: Pulse sequence used for accessing long-lived singlet order in monodeuterated methyl groups and measuring its decay.

The pulse sequence used to monitor long-lived state relaxation is illustrated in Figure S6. The resonance offset was placed in the centre of the  $\text{CH}_2\text{D}$  peak at 2.18ppm. A two-step phase cycle, in which the phase of the  $90_{90}$  pulse and the receiver are simultaneously changed by  $180^\circ$  in successive transients, removes spurious signals generated by longitudinal magnetization generated during the long SLIC pulses.

The singlet state is a magnetically silent arrangement of nuclear spin configurations and is unperturbed by the  $T_{00}$  filter, which employs the optimized parameters shown in Table S1 to remove signals deriving from residual magnetization.

Table S1: Optimized parameters of  $T_{00}$  filter. NMR signals passing through spherical tensors of rank 1 or 2 are destroyed.

| PFG | Shape    | Strength               | Duration |
|-----|----------|------------------------|----------|
| G1  | SINE.100 | 5.0 $\text{Gcm}^{-1}$  | 4.4 ms   |
| G2  | SINE.100 | -5.0 $\text{Gcm}^{-1}$ | 2.4 ms   |
| G3  | SINE.100 | -7.5 $\text{Gcm}^{-1}$ | 2.0 ms   |

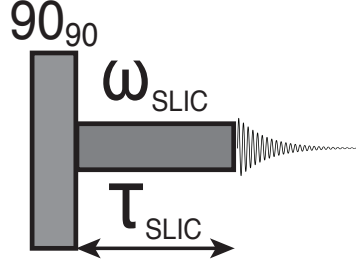

Figure S7: Pulse sequence for optimizing long-lived state access and read-out using SLIC.

The SLIC pulse amplitude and duration were optimized using the pulse sequence given in Figure S7. A two-step phase cycle is used to remove spurious signals generated by longitudinal magnetization accrued during the SLIC pulse. For optimization, one parameter is held constant whilst the other parameter is varied. A reduction in signal amplitude indicates successful conversion of magnetization into NMR-silent singlet order. The results of the SLIC optimization are shown in Figure S8 for the case of degassed  $\text{CD}_2\text{Cl}_2$  solution at  $25^\circ\text{C}$ . (a)  $\omega_{\text{SLIC}}/(2\pi) = 11.7$  Hz. (b)  $\tau_{\text{SLIC}} = 100\text{ms}$  (11.7 T, 500 MHz) and  $\tau_{\text{SLIC}} = 73$  ms (14.1 T, 600 MHz) (not shown).

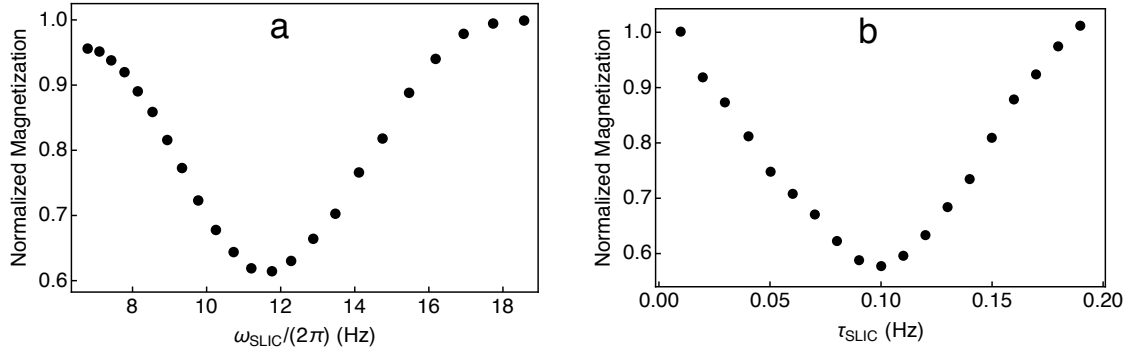

Figure S8: (a) Optimization of SLIC pulse amplitude ( $\omega_{\text{SLIC}}/(2\pi)$ ) and (b) duration ( $\tau_{\text{SLIC}}$ ) for (N- $\text{CH}_2\text{D}$ )-2-methylpiperidine in  $\text{CD}_2\text{Cl}_2$  solution at 11.7 T (500 MHz).  $\omega_{\text{SLIC}}/(2\pi)$  (= 11.7 Hz) and  $\tau_{\text{SLIC}}$  (= 100 ms) are plotted against normalized magnetization.

### 3.3 Relaxation times

#### 3.3.1 Singlet and longitudinal relaxation

Table S2: The set of singlet relaxation times  $T_1$  and longitudinal relaxation times  $T_S$  for the  $\text{CH}_2\text{D}$  group of (N- $\text{CH}_2\text{D}$ )-2-methylpiperidine shown in Figure 5 of the main paper. The symbols used in that figure are shown.  $\blacktriangle$  denotes (N- $\text{CH}_2\text{D}$ )-2-( $\text{CD}_3$ )-methylpiperidine. All sample concentrations were 0.1 M.

| Solvent                  | Temp. | Magnetic Field   | $T_S^{-1}/\text{s}^{-1}$ | $T_1^{-1}/\text{s}^{-1}$ | Symbol           |
|--------------------------|-------|------------------|--------------------------|--------------------------|------------------|
| $\text{C}_6\text{D}_6$   | 25°C  | 14.1 T (600 MHz) | $34.3 \pm 0.7$           | $10.9 \pm 0.2$           | $\bullet \circ$  |
| $\text{C}_6\text{D}_6$   | 30°C  | 14.1 T (600 MHz) | $38.2 \pm 0.9$           | $11.6 \pm 0.2$           | $\bullet$        |
| $\text{C}_6\text{D}_6$   | 35°C  | 14.1 T (600 MHz) | $39.9 \pm 0.7$           | $12.5 \pm 0.3$           | $\bullet$        |
| $\text{C}_6\text{D}_6$   | 40°C  | 14.1 T (600 MHz) | $43.8 \pm 0.8$           | $13.3 \pm 0.2$           | $\bullet$        |
| $\text{C}_6\text{D}_6$   | 45°C  | 14.1 T (600 MHz) | $46.1 \pm 0.7$           | $14.3 \pm 0.3$           | $\bullet$        |
| $\text{C}_6\text{D}_6$   | 50°C  | 14.1 T (600 MHz) | $48.9 \pm 0.9$           | $15.1 \pm 0.3$           | $\bullet$        |
| $\text{C}_6\text{D}_6$   | 55°C  | 14.1 T (600 MHz) | $52 \pm 1$               | $15.7 \pm 0.3$           | $\bullet$        |
| $\text{C}_6\text{D}_6$   | 60°C  | 14.1 T (600 MHz) | $55 \pm 1$               | $16.7 \pm 0.3$           | $\bullet$        |
| $\text{C}_6\text{D}_6$   | 25°C  | 9.4 T (400 MHz)  | $38 \pm 2$               | $12.1 \pm 0.4$           | $\circ$          |
| $\text{C}_6\text{D}_6$   | 25°C  | 11.7 T (500 MHz) | $35.2 \pm 0.7$           | $11.3 \pm 0.3$           | $\circ \bullet$  |
| $\text{CD}_3\text{CN}$   | 25°C  | 11.7 T (500 MHz) | $32.8 \pm 0.6$           | $10.2 \pm 0.2$           | $\blacksquare$   |
| $\text{CD}_2\text{Cl}_2$ | 25°C  | 11.7 T (500 MHz) | $27.0 \pm 0.6$           | $8.7 \pm 0.1$            | $\blacktriangle$ |
| $\text{CD}_3\text{OD}$   | 25°C  | 11.7 T (500 MHz) | $22.3 \pm 0.5$           | $6.9 \pm 0.1$            | $\blacklozenge$  |
| $\text{CH}_2\text{Cl}_2$ | 25°C  | 11.7 T (500 MHz) | $20.9 \pm 0.8$           | $7.3 \pm 0.2$            | $\blacktriangle$ |
| $\text{CD}_2\text{Cl}_2$ | 25°C  | 11.7 T (500 MHz) | $27.1 \pm 0.6$           | $8.8 \pm 0.2$            | $\blacktriangle$ |

Longitudinal relaxation times  $T_1$  and singlet relaxation times  $T_S$  included in Figure 5 of the main paper for (N- $\text{CH}_2\text{D}$ )-2-methylpiperidine are shown in Table S2. The experimental conditions are as follows:

- ( $\bullet$ ) 25-60°C temperature (5°C increment), 14.1 T (600 MHz),  $\text{C}_6\text{D}_6$  solvent
- ( $\circ$ ) 9.4 T (400 MHz) - 14.1 T (600 MHz) magnetic field (2.35 T (100 MHz) increment), 25°C and  $\text{C}_6\text{D}_6$  solvent
- ( $\bullet$ )  $\text{C}_6\text{D}_6$ , ( $\blacksquare$ )  $\text{CD}_3\text{CN}$ , ( $\blacktriangle$ )  $\text{CD}_2\text{Cl}_2$  and ( $\blacklozenge$ ) MeOD solvent, 25°C and 11.7 T (500 MHz)
- ( $\blacktriangle$ ) 25°C, 11.7 T (500 MHz) and  $\text{CH}_2\text{Cl}_2$  solvent
- ( $\blacktriangle$ ) (N- $\text{CH}_2\text{D}$ )-2-( $\text{CD}_3$ )-piperidine at 25°C, 11.7 T (500 MHz) and  $\text{CD}_2\text{Cl}_2$  solvent.

Data showing the temperature-dependence of the relaxation time constants is given in Figure S9. The increase of  $T_1$  and  $T_S$  with increasing  $T$  (Figure S9a) indicates that spin-rotation relaxation is not significant in this case. The linear relationship of  $T_S^{-1}$  and  $T_1^{-1}$  (Figure S9b) indicates a common correlation time for these processes.

Data showing the dependence of  $T_S^{-1}$  on the spin-locking field amplitude, expressed as a nutation frequency  $\omega_{\text{LOCK}}$ , is shown in Figure S10. The sharp decrease at low  $\omega_{\text{LOCK}}$  values is due to the suppression of singlet-triplet leakage by the applied rf field. In most

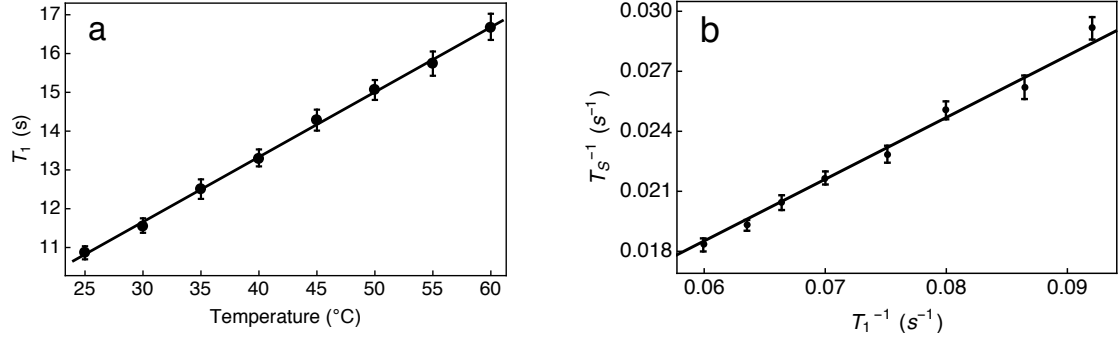

Figure S9: Left: Longitudinal relaxation times ( $T_1$ ) of 0.1 M (N-CH<sub>2</sub>D)-2-methylpiperidine plotted as a function of temperature. Experiments were performed in degassed C<sub>6</sub>D<sub>6</sub> solution at 14.1 T (600 MHz). (a) Longitudinal relaxation rates ( $T_1^{-1}$ ) plotted against singlet relaxation rates ( $T_S^{-1}$ ) between 25 - 60°C. (b) Singlet relaxation measurements were performed under identical experimental conditions.

experiments we used an rf locking field with amplitude  $\omega_{\text{LOCK}}/2\pi = 300$  Hz which is sufficient to suppress singlet-triplet leakage.

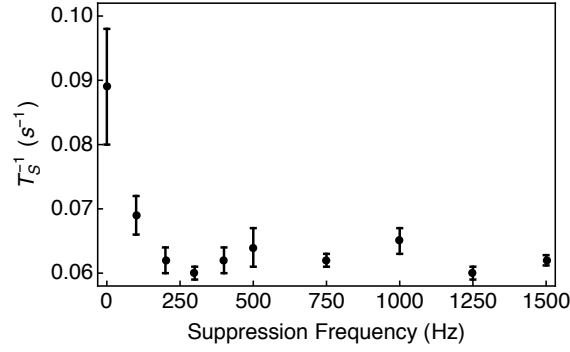

Figure S10: Experimental dependence of  $T_S^{-1}$  on the spin-lock rf field strength for 0.1 M (N-CH<sub>2</sub>D)-2-methylpiperidine in non-degassed CD<sub>2</sub>Cl<sub>2</sub> solvent (proton frequency 500 MHz, temperature 25°C).

### 3.3.2 $^{13}\text{C}$ relaxation

The measured  $^{13}\text{C}$   $T_1$  values for N-CH<sub>2</sub>D-2-methylpiperidine are shown in Table S3 with the  $^{13}\text{C}$  numbering scheme shown in Figure S11. These relaxation times were measured by inversion recovery with 0.5 kHz  $^1\text{H}$  decoupling.

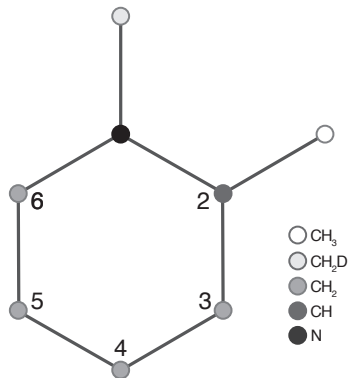

Figure S11: Structure of (N-CH<sub>2</sub>D)-2-methylpiperidine, showing the numbering of  $^{13}\text{C}$  sites on the (N-CH<sub>2</sub>D)-2-methylpiperidine ring.

Table S3:  $^{13}\text{C}$  longitudinal relaxation times  $T_1$  for the ring carbons of 0.1 M (N-CH<sub>2</sub>D)-2-methylpiperidine in degassed CD<sub>2</sub>Cl<sub>2</sub> solution at 11.7 T (500 MHz) and 25°C.

| Site | Chemical Shift | $T_1/\text{s}$ |
|------|----------------|----------------|
| 2    | 59 ppm         | $10.2 \pm 0.3$ |
| 3    | 34 ppm         | $6.3 \pm 0.5$  |
| 4    | 24 ppm         | $6.2 \pm 0.2$  |
| 5    | 26 ppm         | $6.5 \pm 0.3$  |
| 6    | 56 ppm         | $6.9 \pm 0.4$  |

### 3.3.3 $^2\text{H}$ relaxation

The spin-lattice relaxation time of the CH<sub>2</sub>D deuteron  $T_1(^2\text{H})$  was measured by inversion recovery to be  $0.75 \pm 0.01$  s at 500 MHz and 25°C in 0.1 M degassed CD<sub>2</sub>Cl<sub>2</sub> solution.

#### 4. Relaxation Theory

Consider a H<sub>2</sub>D system, comprised by the two protons and the deuterium of a singly deuterated methyl group in solution. The two proton spins are labelled as 1 and 2, the deuterium spin as 3. In this study, relaxation rates are calculated for the longitudinal magnetization of the protons,  $I_{1z} + I_{2z}$ , and of the deuterium,  $I_{3z}$ , as well as the singlet order for the proton pair:

$$\hat{T}_{00}^{12} = \hat{I}_1 \cdot \hat{I}_2 = \hat{I}_{1x}\hat{I}_{2x} + \hat{I}_{1y}\hat{I}_{2y} + \hat{I}_{1z}\hat{I}_{2z}. \quad (\text{S1})$$

An expression of the relaxation superoperator may be derived in the standard semi-classical treatment of spin relaxation [1]. Internal motion is described with a 3-site jump model, with jump rate  $\kappa$ , and a spherical top is assumed for overall motion, with correlation time  $\tau_C$ . The relaxation superoperator for the dipolar and quadrupolar interactions may be written [2]:

$$\hat{\Gamma} = - \sum_{\lambda, \lambda'} c^\lambda c^{\lambda'} J_0^{\lambda, \lambda'} \sum_m (-1)^m \hat{T}_{2m}^\lambda \hat{T}_{2-m}^{\lambda'}. \quad (\text{S2})$$

The sum is over spin interactions  $\lambda$ . Here we consider the dipolar coupling for each spin pair  $ij$  and the quadrupolar interaction for the deuterium (spin 3). The chemical-shielding anisotropy is ignored.  $c^\lambda$ ,  $A_{lm}^\lambda$  and  $\hat{T}_{l-m}^\lambda$  are given in Table S4.  $c^\lambda$  is a real constant.  $A_{lm}^\lambda$  and  $T_{l-m}^\lambda$  are the spatial and spin tensors for the incoherent Hamiltonian  $\hat{H}_{\text{fluc}}$ ;

$$\begin{aligned} J_0^{\lambda, \lambda'} &= \frac{1}{5} A_{20}^{P, \lambda} A_{20}^{P, \lambda'} \sum_{m_2} \frac{\tau_C}{1 + 3\epsilon_{m_2} \kappa \tau_C} \\ &\times D_{0m_2}^{2*}(\Omega_{PR}^\lambda) D_{0m_2}^2(\Omega_{PR}^{\lambda'}), \end{aligned} \quad (\text{S3})$$

where

$$\epsilon_0 = 0 \quad \text{and} \quad \epsilon_{\pm 1} = \epsilon_{\pm 2} = 1; \quad (\text{S4})$$

is the spectral density at zero frequency for the correlation between interactions  $\lambda$  and  $\lambda'$ ;  $D_{mm'}^2$  is a component of the Wigner matrix of rank 2;  $\Omega_{PR}^\lambda$  is the set of Euler angles that describes a transformation from the principal axis system of the interaction  $P$  to a rotor frame  $R$  fixed with respect to the CH<sub>2</sub>D group and with its z-axis aligned with the local 3-fold symmetry axis. This general expression can be used to calculate all auto-correlation and cross-correlation terms for dipolar and quadrupolar interactions.

Using the relaxation superoperator described in Equation S2, relaxation rates may be calculated as follows for the <sup>1</sup>H and <sup>2</sup>H longitudinal magnetization and for <sup>1</sup>H singlet order:

$$T_{1H}^{-1} = \frac{\langle \hat{I}_{1z} + \hat{I}_{2z} | \hat{\Gamma} | \hat{I}_{1z} + \hat{I}_{2z} \rangle}{\langle \hat{I}_{1z} + \hat{I}_{2z} | \hat{I}_{1z} + \hat{I}_{2z} \rangle}, \quad (\text{S5})$$

$$T_{1D}^{-1} = \frac{\langle \hat{I}_{3z} | \hat{\Gamma} | \hat{I}_{3z} \rangle}{\langle \hat{I}_{3z} | \hat{I}_{3z} \rangle}, \quad (\text{S6})$$

$$T_S^{-1} = \frac{\langle \hat{T}_{00}^{12} | \hat{\Gamma} | \hat{T}_{00}^{12} \rangle}{\langle \hat{T}_{00}^{12} | \hat{T}_{00}^{12} \rangle}. \quad (\text{S7})$$

The contribution of the dipole-dipole interaction to <sup>2</sup>H longitudinal relaxation is found to be negligible and is not included in Equation 4 of the main text. In practice, the rele-

Table S4: Tensor components of the rank-2 interaction ( $l = 2$ ): the dipole-dipole (DD) interaction for a spin pair  $ij$  and the quadrupolar (Q) interaction for a spin  $i$ . The  $T_{2m}$  tensor components are given in the laboratory frame and the  $A_{2m}$  tensor components are given in the principal axis system of the interaction.  $r_{ij}$  is the internuclear distance between spin  $i$  and spin  $j$ ,  $eQ_i$  is the quadrupole moment and  $eq_i$  is the electric field gradient for nucleus  $i$ ,  $\eta_{\lambda,i}$  is the biaxiality of interaction  $\lambda$ .

| $\lambda$ | $c^\lambda$                                            | $m$     | $A_{2m}$      | $T_{2m}$                                      |
|-----------|--------------------------------------------------------|---------|---------------|-----------------------------------------------|
| DD        | $-\frac{\mu_0 \gamma_i \gamma_j \hbar}{4\pi r_{ij}^3}$ | 0       | $6^{1/2}$     | $6^{-1/2} (3I_{iz}I_{jz} - I_i \cdot I_j)$    |
|           |                                                        | $\pm 1$ | 0             | $\mp (1/2) (I_{i\pm}I_{jz} + I_{iz}I_{j\pm})$ |
|           |                                                        | $\pm 2$ | 0             | $(1/2) I_{i\pm}I_{j\pm}$                      |
| Q         | $\frac{e^2 q_i Q_i}{2I(2I-1)\hbar}$                    | 0       | $(3/2)^{1/2}$ | $6^{-1/2} (3I_{iz}^2 - I(I+1))$               |
|           |                                                        | $\pm 1$ | 0             | $\mp (1/2) (I_{i\pm}I_{iz} + I_{iz}I_{i\pm})$ |
|           |                                                        | $\pm 2$ | $(1/2)\eta_i$ | $(1/2) I_{i\pm}^2$                            |

vant matrix elements were calculated analytically using the *Mathematica*-based symbolic package *SpinDynamica* [3].

Figure S12 shows the relevant angles for the rates given in Equation S5-S7. The second Euler angle  $\beta_{PR}$  is equal to  $\pi/2$  for the three dipole-dipole interactions. The third Euler angle  $\gamma_{PR}$  is  $\theta$  for the  $H_1D$  interaction and  $-\theta$  for the  $H_2D$  interaction. For the quadrupolar interaction, the dominant principal axis of the  $^2D$  electric field gradient tensor is assumed to be along the CD bond vector, so that  $\beta_{PR} = \theta_Q$ , where  $\theta_Q$  is the angle formed by the 3-fold jump axis and the CD bond.

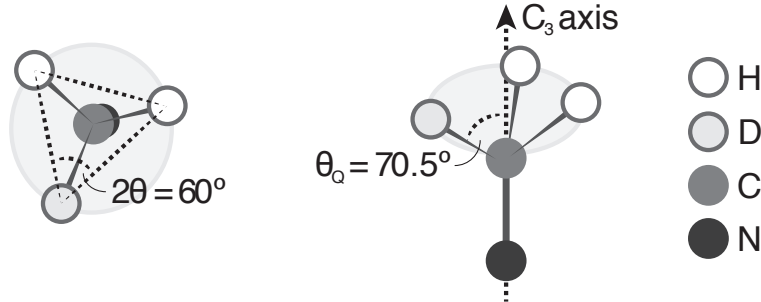

Figure S12: Schematic of a point-particle model with an equilateral triangle geometry perpendicular to and in the plane of the  $CH_2D$  group. The light grey disk denotes the plane of the  $CH_2D$  group.  $2\theta = 60^\circ$  and  $\theta_Q = 70.5^\circ$  for an equilateral triangle geometry.

## 5. References

- [1] A.Abragam, *Principles of Nuclear Magnetism*, Clarendon Press, Oxford, 1961.
- [2] J. Kowalewski, J. Mäler, *Nuclear Spin Relaxation in Liquids: Theory, Experiments and Applications*, CRC Press, Boca Raton, 2006.
- [3] SpinDynamica code for Mathematica, programmed by Malcolm H. Levitt, with contributions by Jyrki Rantaharju, Andreas Brinkmann, and Soumya Singha Roy, available at [www.spindynamica.soton.ac.uk](http://www.spindynamica.soton.ac.uk).
